# Supplementary material for: Evolution of Graves’ Disease during Immune Reconstitution following Nonmyeloablative Haploidentical Peripheral Blood Stem Cell Transplantation in a Boy Carrying Germline SAMD9L and FLT3 Variants
Source: MDPI journal article supplement (doi:10.3390/ijms23169494), 2022-08-22
Supplement: s1 [file s1]

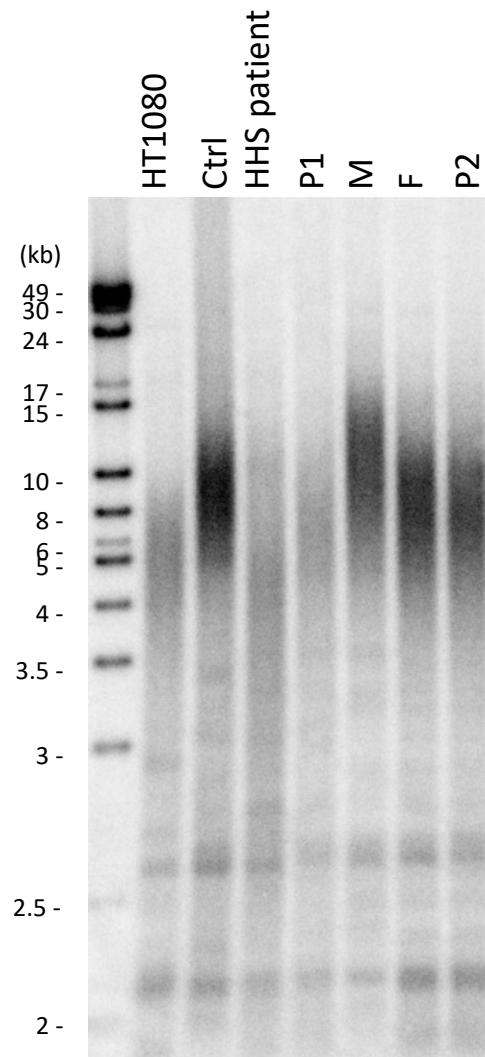

**Figure S1.** Telomere length analysis (by terminal restriction fragment assay) of DNA from leukocytes of the patient pre-transplant (P1) and 1.5 years post-transplant (P2), patient's father (F), patient's mother (M), an age-matched healthy control (Ctrl), an age-matched patient with Hoyerall-Hreidarsson syndrome (HHS patient) and from HT1080 fibrosarcoma cancer cells.
